# Supplementary material
Source: PubMed Central journal article supplement (PMC6669100)
Supplement: NIHMS1036350-supplement-Supplement.pdf [file NIHMS1036350-supplement-Supplement.pdf]

**Supplemental Digital Content 1.** Patient's demographic and baseline characteristics by combined outcome (in-hospital mortality of ICU LOS $\geq$ 3 days)

| <i>Variable</i>                               | <i>Category</i> | <i>Overall<br/>(2796, 100%)</i> | <i>No combined<br/>outcome<br/>(2048, 73%)</i> | <i>Combined<br/>outcome<br/>(748, 27%)</i> | <i>P-Value</i>     |
|-----------------------------------------------|-----------------|---------------------------------|------------------------------------------------|--------------------------------------------|--------------------|
| Age, mean (SD)                                |                 | 58 (17)                         | 56 (18)                                        | 64 (15)                                    | <.001 <sup>a</sup> |
| median (Q1;Q3)                                |                 | 59 (48;70)                      | 57 (45; 68)                                    | 64 (54; 74)                                |                    |
| Gender                                        | Female          | 1431 (51)                       | 1052 (51)                                      | 379 (51)                                   | 0.745 <sup>b</sup> |
| Race                                          | Black           | 1400 (50)                       | 1016 (50)                                      | 384 (51)                                   | 0.415 <sup>b</sup> |
|                                               | White           | 1255 (45)                       | 933 (46)                                       | 322 (43)                                   |                    |
|                                               | Other           | 141 (5)                         | 99 (4)                                         | 42 (6)                                     |                    |
| Comorbidities                                 |                 |                                 |                                                |                                            |                    |
| AIDS                                          | Yes             | 89 (3)                          | 74 (83)                                        | 15 (17)                                    | 0.032 <sup>b</sup> |
| Cancer                                        | Yes             | 286 (10)                        | 202 (71)                                       | 84 (29)                                    | 0.293 <sup>b</sup> |
| CHF                                           | Yes             | 563 (20)                        | 325 (58)                                       | 238 (42)                                   | <.001 <sup>b</sup> |
| COPD                                          | Yes             | 906 (32)                        | 614 (68)                                       | 292 (32)                                   | <.001 <sup>b</sup> |
| CVD                                           | Yes             | 233 (8)                         | 130 (56)                                       | 103 (44)                                   | <.001 <sup>b</sup> |
| DM (no complications) <sup>1</sup>            | Yes             | 852 (31)                        | 611 (72)                                       | 241 (28)                                   | 0.229 <sup>b</sup> |
| DM (complications) <sup>2</sup>               | Yes             | 204 (7)                         | 154 (75)                                       | 50 (25)                                    | 0.450 <sup>b</sup> |
| Dementia                                      | Yes             | 133 (5)                         | 85 (64)                                        | 48 (36)                                    | 0.013 <sup>b</sup> |
| ESRD                                          | Yes             | 200 (7)                         | 114 (57)                                       | 37 (13)                                    | <.001 <sup>b</sup> |
| Liver (mild) <sup>*</sup>                     | Yes             | 281 (10)                        | 164 (58)                                       | 117 (42)                                   | <.001 <sup>b</sup> |
| Liver (moderate-severe) <sup>#</sup>          | Yes             | 63 (2)                          | 33 (52)                                        | 30 (48)                                    | <.001 <sup>b</sup> |
| Myocardial Infarctions                        | Yes             | 198 (7)                         | 103 (52)                                       | 95 (48)                                    | <.001 <sup>b</sup> |
| Metastatic cancer                             | Yes             | 98 (4)                          | 62 (63)                                        | 36 (37)                                    | <.001 <sup>b</sup> |
| Charlson comorbidity index,<br>median (Q1;Q3) | Yes             | 2 (0; 4)                        | 1 (0; 3)                                       | 3 (1; 4)                                   | <.001 <sup>a</sup> |
| Alert Order <sup>a</sup>                      | Yes             | 337 (12)                        | 294 (12)                                       | 43 (15)                                    | 0.087 <sup>b</sup> |
| Mechanical Ventilation                        | Yes             | 162 (6)                         | 8 (5)                                          | 154 (95)                                   | <.001 <sup>b</sup> |
| Vasopressors                                  | Yes             | 722 (26)                        | 202 (28)                                       | 520 (72)                                   | <.001 <sup>b</sup> |

Abbreviations: AIDS =acquired immune immune deficiency syndrome, CHF=congestive heart failure, COPD=chronic obstructive pulmonary disease, CVD=cerebrovascular disease, DM=diabetes mellitus, ESRD=end stage renal disease.

**Supplemental Digital Content 2.** Features of Sepsis Encounters by combined outcome (mortality or ICU LOS $\geq$ 3 days)

| <i>Variable<br/>(n, % of total)</i>      | <i>Overall<br/>(2796, 100%)</i> | <i>No combined<br/>outcome<br/>(2048, 73%)</i> | <i>Combined outcome<br/>(748, 27%)</i> | <i>P-Value</i>     |
|------------------------------------------|---------------------------------|------------------------------------------------|----------------------------------------|--------------------|
| <i>Initial Vital Signs*</i>              |                                 |                                                |                                        |                    |
| SBP (mm Hg), n                           | 124 (30.3);2700                 | 127.0 (27.7);2000                              | 116.3 (35.5);700                       | <.001 <sup>a</sup> |
| HR (beats/min), n                        | 103.2 (22.9);2685               | 101.8 (20.8);1947                              | 106.8 (27.3);738                       | 0.017 <sup>a</sup> |
| RR (breaths/min), n                      | 19.8 (5.1);2791                 | 19.1 (3.9);2048                                | 21.7 (7.0);743                         | <.001 <sup>a</sup> |
| Temperature (°F), n                      | 99.1 (2.4);2793                 | 99.3 (2.0);2047                                | 98.3 (3.1);746                         | <.001 <sup>a</sup> |
| SpO <sub>2</sub> (%), n                  | 96.1 (5.5);2791                 | 96.7 (4.2)                                     | 94.6 (7.9);747                         | <.001 <sup>a</sup> |
| <i>Lab Findings</i>                      |                                 |                                                |                                        |                    |
| Initial WBC* (thous/mm <sup>3</sup> ), n | 14.5 (7.8);2795                 | 14.5 (7.4);2047                                | 14.7 (8.8);748                         | 0.567 <sup>a</sup> |
| Lactate*, (mmol/L), n                    | 2.9(3.0);1387                   | 2.1 (1.4);791                                  | 4.0 (4.1);596                          | <.001 <sup>a</sup> |
| Lactate, (mmol/L)                        |                                 |                                                |                                        |                    |
| ≥ 4, n                                   | 398 (18)                        | 211 (12)                                       | 187 (41)                               | <.001 <sup>b</sup> |
| 2 to 3.9, n                              | 782 (36)                        | 622 (36)                                       | 160 (35)                               |                    |
| < 2, n                                   | 987 (46)                        | 873 (52)                                       | 114 (24)                               |                    |
| Creatinine (mg/dL), n                    | 1.8 (2.1);2796                  | 1.6 (1.9);2048                                 | 2.4 (2.5);748                          | <.001 <sup>a</sup> |
| Positive culture                         |                                 |                                                |                                        |                    |
| Any, n                                   | 2279                            | 1226                                           | 1053                                   |                    |
| Blood, n                                 | 785 (34)                        | 453 (37)                                       | 332 (32)                               | <.001 <sup>b</sup> |
| Respiratory, n                           | 594 (27)                        | 205 (17)                                       | 389 (37)                               |                    |
| Urine, n                                 | 757 (33)                        | 456 (37)                                       | 301 (29)                               |                    |
| Wound, n                                 | 143 (6)                         | 112 (9)                                        | 31 (2)                                 |                    |

Abbreviations: SBP = systolic blood pressure, WBC = white blood cell count, HR = heart rate, RR = respiratory rate. Data are counts (percentages), unless otherwise specified \* for means (SDs); n <sup>a</sup>Wilcoxon rank sum test; <sup>b</sup>Pearson's Chi-square test.

**Supplemental Digital Content 3.** Results models for in-hospital mortality.

| Predictor SOFA component | Additional Variables in the Final model             | Residual Chi-Square test p-value | Unadjusted OR (95% CI) | Adjusted OR (95% CI) |
|--------------------------|-----------------------------------------------------|----------------------------------|------------------------|----------------------|
| Respiration              | Age, Charlson, Vasopressors, Mechanical Ventilation | 0.570                            | 1.77 (1.62, 1.92)      | 1.33 (1.021, 1.47)   |
| Coagulation              | Age, Charlson, Vasopressors, Mechanical Ventilation | 0.379                            | 1.81 (1.56, 2.10)      | 1.60 (1.32, 1.93)    |
| Liver                    | Age, Charlson, Vasopressors, Mechanical Ventilation | 0.284                            | 1.83 (1.58, 2.12)      | 1.58 (1.32, 1.90)    |
| Cardiovascular           | Age, Charlson, Vasopressors, Mechanical Ventilation | 0.806                            | 2.01 (1.92, 2.27)      | 1.13 (1.01, 1.25)    |
| Renal                    | Age, Charlson, Vasopressors, Mechanical Ventilation | 0.477                            | 1.47 (1.34, 1.61)      | 1.14 (1.02, 1.27)    |
| Neurologic               | Age, Charlson, Vasopressors, Mechanical Ventilation | 0.540                            | 0.75 (1.59, 1.92)      | 1.20 (1.07, 1.35)    |

Abbreviations: SOFA, sequential organ failure assessment score; Charlson, Charlson Comorbidity score; OR, odds ratio.

**Supplemental Digital Content 4.** Results models for combined outcome (mortality or ICU LOS $\geq$ 3 days).

| Predictor SOFA component | Final model                                         | Residual Chi-Square test p-value | Unadjusted OR (95% CI) | Adjusted OR (95% CI)   |
|--------------------------|-----------------------------------------------------|----------------------------------|------------------------|------------------------|
| Respiration              | Age, Charlson, Vasopressors, Mechanical Ventilation | 0.912                            | 2.29 (2.12, 2.48)      | 1.97 (1.79, 2.16)      |
| Coagulation              | Age, Charlson, Vasopressors, Mechanical Ventilation | 0.719                            | 1.54 (1.35, 1.73)      | 1.30 (1.10, 1.54)      |
| Liver                    | Age, Charlson, Vasopressors, Mechanical Ventilation | 0.439                            | 1.47 (1.29, 1.66)      | Not in the final model |
| Cardio                   | Age, Charlson, Vasopressors, Mechanical Ventilation | 0.583                            | 2.53 (2.32, 2.75)      | 1.38 (1.23, 1.54)      |
| Renal                    | Age, Charlson, Vasopressors, Mechanical Ventilation | 0.813                            | 1.47 (1.38, 1.57)      | 1.19 (1.08, 1.30)      |
| Neurologic               | Age, Charlson, Vasopressors, Mechanical Ventilation | 0.906                            | 2.12 (1.95, 2.30)      | 1.72 (1.54, 1.92)      |

Abbreviations: SOFA, sequential organ failure assessment score; Charlson, Charlson Comorbidity score; OR, odds ratio.
